# Supplementary material for: Psychomotor Slowing in Psychosis and Inhibitory Repetitive Transcranial Magnetic Stimulation: A Randomized Clinical Trial
Source: PubMed Central journal article supplement (PMC10902782; doi:10.1001/jamapsychiatry.2024.0026), 2024-02-28
Supplement: jamapsychiatry-e240026-s003.pdf [file jamapsychiatry-e240026-s003.pdf]

## **Data Sharing Statement**

### **Data**

**Data available:** No

### **Additional Information**

**Explanation for why data not available:** participants have not provided consent to broad data sharing of their health related data
